# Supplementary material for: Phosphorus Transport in Subsurface Flow at Beech Forest Stands: Does Phosphorus Mobilization Keep up with Transport?
Source: Copernicus journal article supplement (doi:10.5194/bg-2020-118), 2020-04-20
Supplement: Supplementary file 1 [file bg-2020-118-supplement.pdf]

## 11. Supplement

615 **Suppl. Tab. 1: Difference between the median P<sub>tot</sub> concentration on the rising and falling limb of the sprinkling experiments in [mg/l]. Positive values indicate that P<sub>tot</sub> concentrations on the rising limb are higher than on the falling limb and negative values vice versa. Small values indicate that the difference between the median P<sub>tot</sub> concentration on the rising and falling limb is small which means that the hysteresis is small and vice versa. Bold values indicate that the difference between P<sub>tot</sub> concentration on the rising and falling limb is significantly different. NA indicates that this lysimeter or trench does not exist (TUT) or has not yield any water sample during the experiment (MIT).**

| Event      | LY1B         | LY2B          | LY3B         | LY4B         | TR1B         | TR2B         | TR3B  |
|------------|--------------|---------------|--------------|--------------|--------------|--------------|-------|
| MIT Summer | <b>0.642</b> | 0.010         | 0.072        | <b>0.104</b> | -0.007       | <b>0.117</b> | NA    |
| MIT Spring | <b>0.051</b> | 0.007         | <b>0.059</b> | 0.011        | 0.008        | 0.017        | NA    |
| CON Summer | <b>0.063</b> | 0.004         | 0.012        | 0.000        | 0.488        | 0.059        | 0.062 |
| CON Spring | <b>0.176</b> | <b>0.113</b>  | <b>0.007</b> | -0.005       | 0.349        | <b>0.035</b> | 0.027 |
| TUT Summer | <b>0.319</b> | <b>-0.019</b> | 0.003        | NA           | <b>0.106</b> | 0.006        | NA    |
| TUT Spring | <b>0.049</b> | 0.003         | <b>0.029</b> | NA           | <b>0.072</b> | <b>0.008</b> | NA    |
